# Supplementary material for: An epigenetic clock analysis of race/ethnicity, sex, and coronary heart disease
Source: PubMed Central journal article supplement (PMC4980791; doi:10.1186/s13059-016-1030-0), 2016-08-11

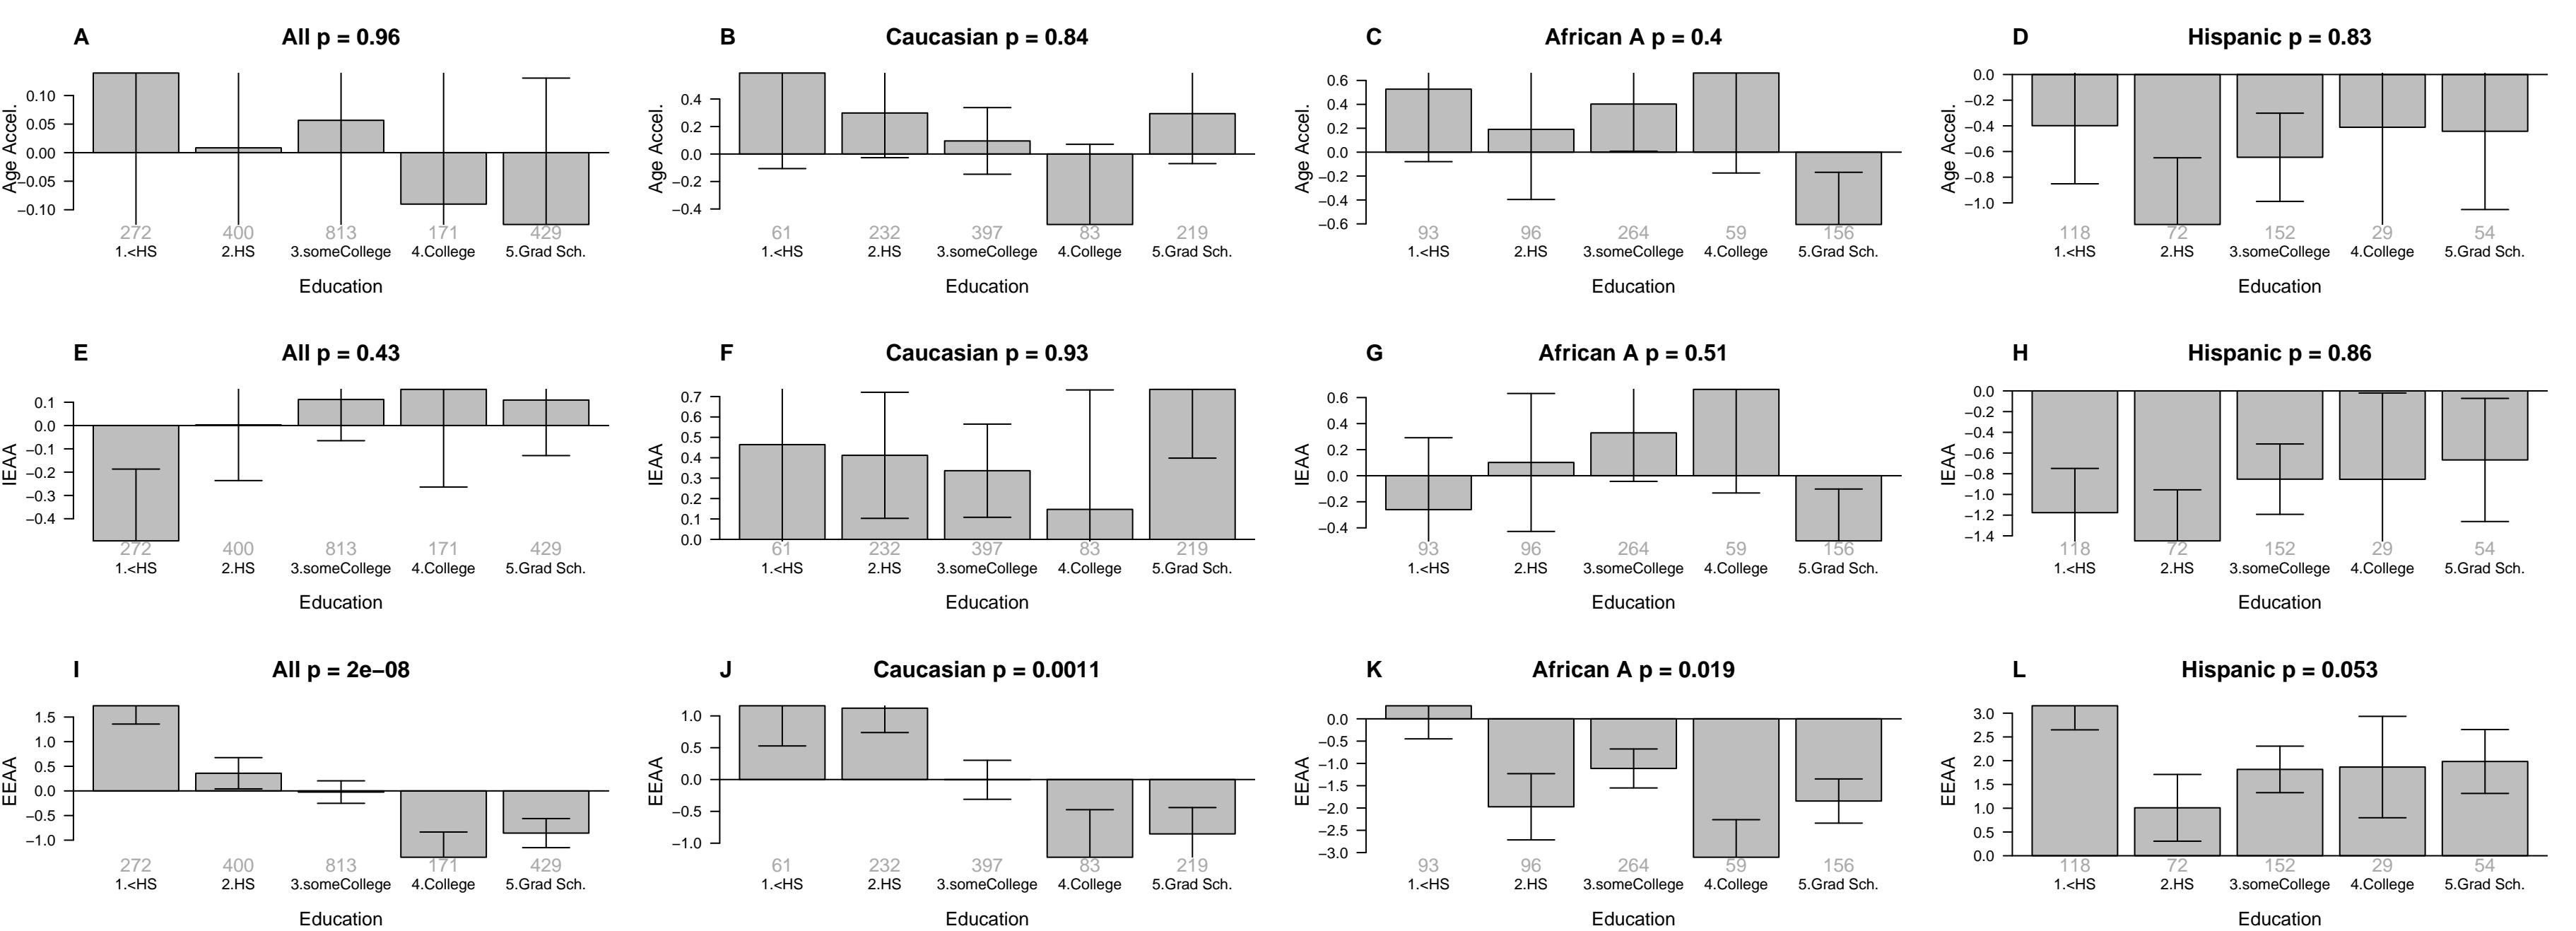

Supplement: 13059_2016_1030_MOESM4_ESM.pdf [file 13059_2016_1030_MOESM4_ESM.pdf]
